# Supplementary material for: Electrospun polar-nanofiber PVDF separator for lithium–sulfur batteries with enhanced charge storage capacity and cycling durability
Source: Royal Society of Chemistry journal article supplement (doi:10.1039/d3ya00392b), 2024-01-01
Supplement: d3ya00392b1.pdf [file d3ya00392b1.pdf]

*- Supporting Information -*

**Polar Electrospun-nanofiber PVDF Separators for Lithium-Sulfur Batteries with Enhanced Charge Storage Capacity and Cycling Durability**

Irshad Mohammad <sup>a</sup>, Luke D J Barter <sup>a</sup>, Vlad Stolojan <sup>b</sup>, Carol Crean <sup>a</sup>  
and Robert C T Slade <sup>\*a</sup>

<sup>a</sup> School of Chemistry and Chemical Engineering,  
University of Surrey, Guilford GU2 7XH, United Kingdom

<sup>b</sup> Advanced Technology Institute,  
School of Computer Science and Electrical Engineering,  
University of Surrey, Guilford GU2 7XH, United Kingdom

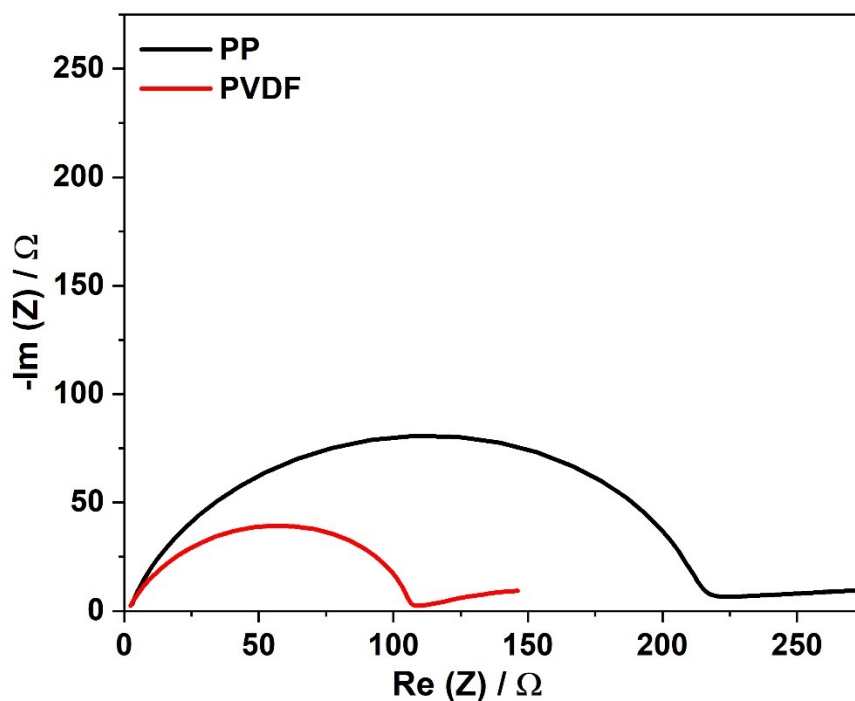

**Figure S1:** Nyquist plots obtained for separate symmetrical cells with PVDF and PP separator.

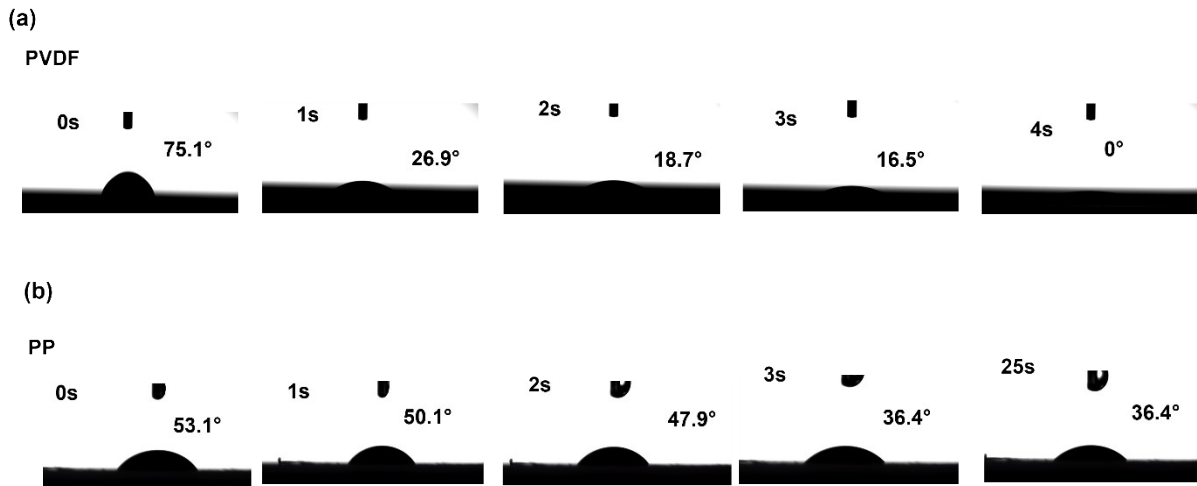

**Figure S2:** Dynamic contact angle measurements with electrolyte for (a) PVDF and (b) PP separator

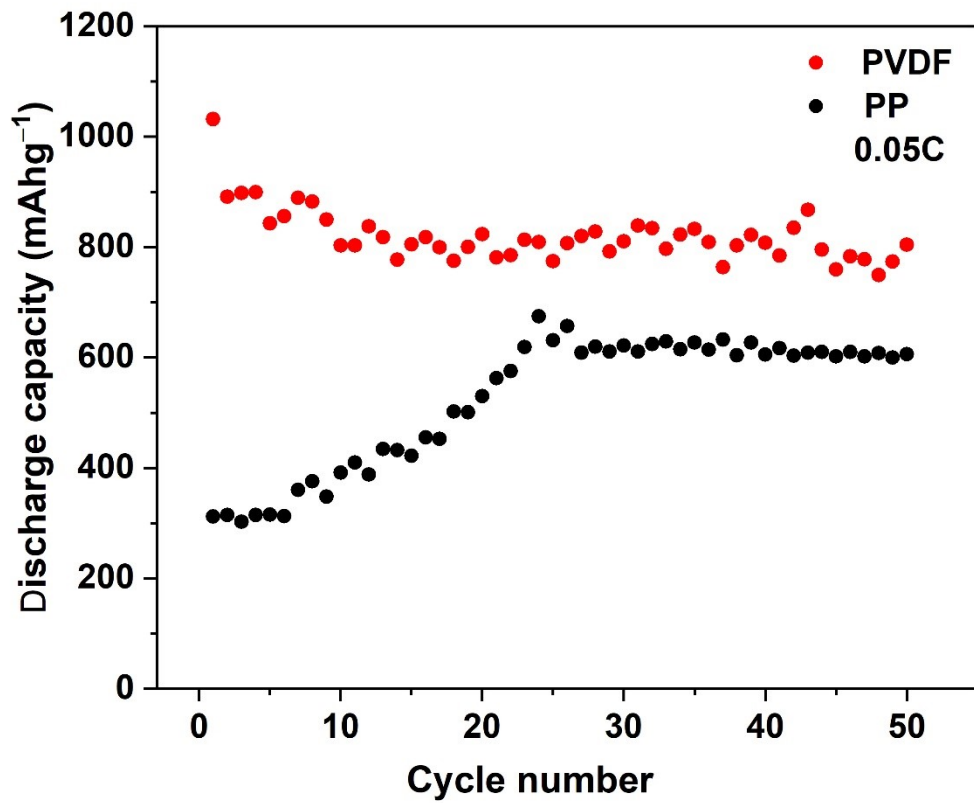

Figure S3: Cycling performance at 0.05C rate of LSB's with PP and PVDF separators.

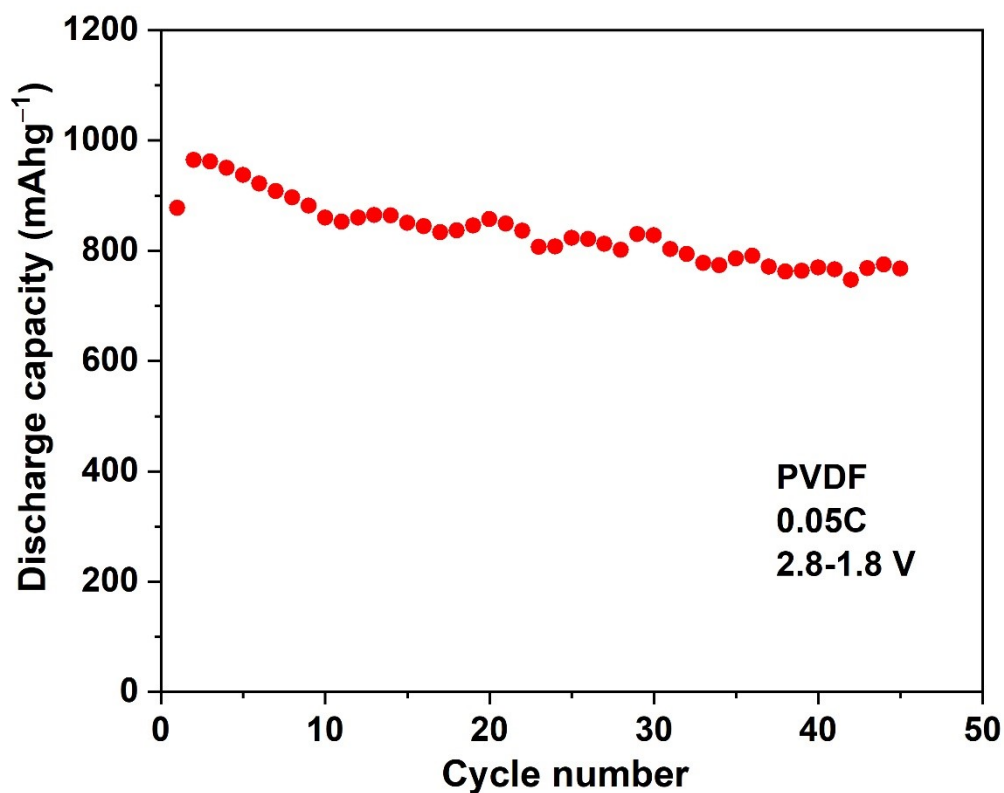

Figure S4: Cycling performance at 0.05 C rate of a replicate LSB cell with PVDF separator

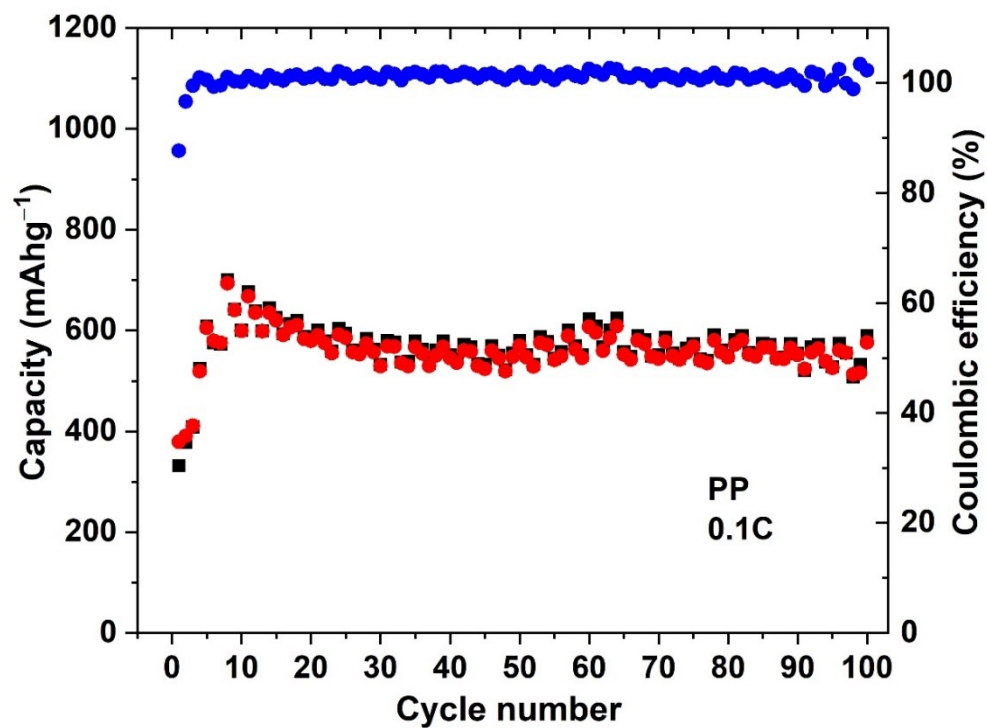

Figure S5: Cyclic performance and coulombic efficiency of an LSB with PP separator.

**Table S1:** Fitting parameter values for Nyquist plots before and after cycling of LSB cells with PP separator. R-e = electrolyte resistance, R-ct = charge-transfer resistance, R-SEI = resistance of solid electrolyte interphase, R-film = related to Li<sub>2</sub>S/Li<sub>2</sub>S<sub>2</sub> film, and Ws = Warburg. CPE-ct, CPE-SEI and CPE-film represent constant phase elements associated with R-ct, R-SEI and R-film, respectively.

| Circuit element               | Before cycling          | After cycling           |
|-------------------------------|-------------------------|-------------------------|
| R-e / ohm                     | 3.2                     | 7.0                     |
| R-ct / ohm                    | 33.3                    | 2.9                     |
| R-SEI / ohm                   | -                       | 1.84                    |
| R-film / ohm                  | -                       | 4.0                     |
| Ws / ohm s <sup>-1/2</sup>    | 5.7                     | 0.9                     |
| CPE-ct / F s <sup>a-1</sup>   | 16.9 × 10 <sup>-6</sup> | 0.3 × 10 <sup>-6</sup>  |
| CPE-SEI / F s <sup>a-1</sup>  | -                       | 18.5 × 10 <sup>-2</sup> |
| CPE-film / F s <sup>a-1</sup> | -                       | 0.4 × 10 <sup>-3</sup>  |

**Table S2:** Fitting parameter values for Nyquist plots before and after cycling of LSB cells with PVDF separator. R-e = electrolyte resistance, R-ct = charge-transfer resistance, R-SEI = resistance of solid electrolyte interphase, R-film = related to  $\text{Li}_2\text{S}/\text{Li}_2\text{S}_2$  film, and Ws = Warburg. CPE-ct, CPE-SEI and CPE-film represent constant phase elements associated with R-ct, R-SEI and R-film, respectively.

| Circuit element               | Before cycling        | After cycling        |
|-------------------------------|-----------------------|----------------------|
| R-e / ohm                     | 2.9                   | 3.9                  |
| R-ct / ohm                    | 19.1                  | 0.4                  |
| R-SEI / ohm                   | -                     | 1.0                  |
| R-film / ohm                  | -                     | 0.9                  |
| Ws / ohm s <sup>-1/2</sup>    | 2.9                   | 2.5                  |
| CPE-ct / F s <sup>a-1</sup>   | $25.1 \times 10^{-6}$ | $3.1 \times 10^{-6}$ |
| CPE-SEI / F s <sup>a-1</sup>  | -                     | $0.1 \times 10^{-3}$ |
| CPE-film / F s <sup>a-1</sup> | -                     | $3.1 \times 10^{-2}$ |
